# Supplementary material for: How do multiple long-term conditions impact on the cost-of-illness in early rheumatoid arthritis?
Source: HighWire-hosted journal article supplement (doi:10.1136/rmdopen-2022-002454), 2022-09-01
Supplement: rmdopen-2022-002454supp001_data_supplement.pdf [file rmdopen-2022-002454supp001_data_supplement.pdf]

## Supplement

### List of Supplement Tables and Figures

Table S1 Data sources for each cost component

Table S2 Inclusion criteria for EULAR list of comorbidities

Table S3 Regression results for the CCI grouping: coefficients of the GLM model estimating direct costs

Table S4 Regression results for the CCI grouping: coefficients of the two-part model estimating indirect costs

Table S5 Regression results for the EULAR grouping in the sensitivity analysis: coefficients of the GLM model estimating direct costs

Table S6 Regression results for the EULAR grouping in the sensitivity analysis: coefficients of the two-part model estimating indirect costs

Table S7 Number of participants with EULAR list of comorbidities from multiple data sources

Figure S1 Data preparation for identifying EULAR list of comorbidities

Figure S2A Average annualised direct costs by age and LTC group (EULAR grouping)

Figure S2B Average annualised indirect costs by age and LTC group (EULAR grouping)

Figure S3A Average annualised direct costs by gender and LTC group (EULAR grouping)

Figure S3B Average annualised indirect costs by gender and LTC group (EULAR grouping)

**Table S1 Data sources for each cost component**

| Cost domain                                       | Data source                                                                                                                           |
|---------------------------------------------------|---------------------------------------------------------------------------------------------------------------------------------------|
| Direct costs                                      |                                                                                                                                       |
| Prescription                                      | PIS dataset<br>PHS: Scottish Drug Tariff,<br>NHSBSA: BNF SNOMED Mapping dataset                                                       |
| Hospitalisation                                   | SMR01 dataset<br>PHS: Specialty Costs R040X, R042X                                                                                    |
| Examinations                                      | SERA: “BloodAndXray” dataset<br>PHS: Specialty Costs R120, R130                                                                       |
| Indirect costs                                    |                                                                                                                                       |
| Productivity loss, including paid and unpaid work | SERA: “Employ” dataset<br>SMR01 dataset<br>ONS: Weekly pay rate, gross (£) for all employee jobs in the United Kingdom at 2020 prices |

Abbreviations: BNF = British National Formulary, NHSBSA = National Health Service Business Service Authority, ONS = Office for National Statistics, PHS = Public Health Scotland, PIS = Prescription Information System, SERA = Scottish Early Rheumatoid Arthritis cohort, SMR01 = Scottish Morbidity Records-general/acute inpatient daycase, SNOMED = Systematised Nomenclature Of Medicine.

**Table S2 Inclusion criteria for EULAR list of comorbidities**

| Disease of interest       | Diagnostic and drug codes                                            |
|---------------------------|----------------------------------------------------------------------|
| Cardiovascular diseases   | ICD-10: I00 – I99<br>BNF: 0202, 0205, 0206, 0209, 0210, 0212         |
| Gastrointestinal diseases | ICD-10: K20 – K95<br>BNF: 01                                         |
| Infections                | ICD-10: A00 – A99, B00 – B99<br>BNF: 05                              |
| Depression                | ICD-10: F30 – F39<br>BNF: 0403                                       |
| Malignancy                | ICD-10: C00 – C99, D00 – D49<br>BNF: 08<br>SMR06: any type of cancer |
| Osteoporosis              | ICD-10: M80 – M85<br>BNF: 0606, 090604, 090501                       |

Abbreviations: BNF = British National Formulary, ICD: International Classification of Diseases.

**Table S3 Regression results for the CCI grouping: coefficients of the GLM model estimating direct costs**

| Covariates                                | Coefficient (95% CI)    | Std. Err | p Value |
|-------------------------------------------|-------------------------|----------|---------|
| <b>Sex</b>                                |                         |          |         |
| Male                                      | Reference               |          |         |
| Female                                    | -0.012 (-0.191, 0.158)  | 0.094    | 0.898   |
| <b>Age group</b>                          |                         |          |         |
| < 45                                      | Reference               |          |         |
| 45 – 54                                   | 0.221 (-0.087, 0.528)   | 0.157    | 0.159   |
| 55 – 64                                   | 0.406 (0.113, 0.698)    | 0.149    | <0.01   |
| 65 – 75                                   | 0.485 (0.186, 0.785)    | 0.153    | <0.01   |
| > 75                                      | 0.688 (0.345, 1.030)    | 0.175    | <0.001  |
| <b>SIMD</b>                               |                         |          |         |
| 1 (most deprived)                         | Reference               |          |         |
| 2                                         | -0.644 (-0.908, -0.381) | 0.134    | <0.001  |
| 3                                         | -0.627 (-0.904, -0.350) | 0.141    | <0.001  |
| 4                                         | -0.572 (-0.837, -0.308) | 0.135    | <0.001  |
| 5 (least deprived)                        | -0.379 (-0.669, -0.088) | 0.148    | <0.05   |
| <b>Clinical outcomes</b>                  |                         |          |         |
| HAQ-DI score                              | 0.178 (0.030, 0.327)    | 0.076    | <0.05   |
| EQ5D score                                | -0.107 (-0.622, 0.408)  | 0.263    | 0.684   |
| <b>Follow-up period</b>                   |                         |          |         |
| Index year                                | Reference               |          |         |
| 2                                         | 0.415 (0.127, 0.703)    | 0.147    | <0.01   |
| 3                                         | 0.552 (0.262, 0.843)    | 0.148    | <0.001  |
| 4                                         | 0.706 (0.414, 0.999)    | 0.149    | <0.001  |
| 5                                         | 0.344 (0.049, 0.640)    | 0.151    | <0.01   |
| 6                                         | 0.517 (0.218, 0.816)    | 0.153    | <0.001  |
| <b>LTC group (using the CCI grouping)</b> |                         |          |         |
| RA alone                                  | Reference               |          |         |
| RA + Single LTC                           | 0.867 (0.633, 1.110)    | 0.119    | <0.001  |
| RA + MLTCs                                | 1.576 (1.300, 1.851)    | 0.141    | <0.001  |

Abbreviations: CCI = Charlson Comorbidity Index, EQ5D= EuroQol- 5 Dimension , GLM= generalised linear model, HAQ-DI= Health Assessment Questionnaire-Disability Index, LTC= long-term conditions, MLTCs= multiple long-term conditions, RA= rheumatoid arthritis, SIMD: Scottish Index of Multiple Deprivation

**Table S4 Regression results for the CCI grouping: coefficients of the two-part model estimating indirect costs**

| Covariates               | 1st modelling part<br>(probability of incurring costs) |             |         | 2nd modelling part<br>(conditional on incurring costs) |          |         |
|--------------------------|--------------------------------------------------------|-------------|---------|--------------------------------------------------------|----------|---------|
|                          | Coefficient<br>(95% CI)                                | Std.<br>Err | p value | Coefficient<br>(95% CI)                                | Std. Err | p value |
| <b>Age group</b>         |                                                        |             |         |                                                        |          |         |
| < 45                     | Reference                                              |             |         | Reference                                              |          |         |
| 45 – 55                  | -0.040<br>(-0.325, 0.255)                              | 0.148       | 0.812   | 0.073<br>(-0.133, 0.279)                               | 0.105    | 0.487   |
| 55 – 65                  | -0.095<br>(-0.371, 0.181)                              | 0.140       | 0.501   | 0.162<br>(-0.033, 0.357)                               | 0.100    | 0.104   |
| <b>Sex</b>               |                                                        |             |         |                                                        |          |         |
| Male                     | Reference                                              |             |         | Reference                                              |          |         |
| Female                   | 0.215<br>(-0.020, 0.450)                               | 0.120       | 0.073   | -0.394<br>(-0.559, -0.229)                             | 0.084    | <0.001  |
| <b>SIMD</b>              |                                                        |             |         |                                                        |          |         |
| 1 (most deprived)        | Reference                                              |             |         | Reference                                              |          |         |
| 2                        | 0.050<br>(-0.266, 0.366)                               | 0.161       | 0.755   | -0.052<br>(-0.250, 0.146)                              | 0.101    | 0.606   |
| 3                        | -0.351<br>(-0.684, -0.019)                             | 0.170       | <0.05   | 0.004<br>(-0.241, 0.233)                               | 0.121    | 0.975   |
| 4                        | -0.457<br>(-0.773, -0.142)                             | 0.161       | <0.01   | -0.168<br>(-0.382, 0.046)                              | 0.109    | 0.125   |
| 5 (least deprived)       | -0.330<br>(-0.693, 0.022)                              | 0.180       | 0.066   | -0.150<br>(-0.395, 0.095)                              | 0.125    | 0.230   |
| <b>Clinical outcomes</b> |                                                        |             |         |                                                        |          |         |
| HAQ-DI score             | 0.640<br>(0.258, 0.627)                                | 0.094       | <0.001  | 0.156<br>(0.033, 0.279)                                | 0.063    | <0.05   |
| EQ5D score               | -2.094<br>(-2.051, -0.795)                             | 0.320       | <0.001  | -0.171<br>(-0.589, 0.248)                              | 0.214    | 0.425   |
| <b>LTC group</b>         |                                                        |             |         |                                                        |          |         |
| RA alone                 | Reference                                              |             |         | Reference                                              |          |         |
| RA + Single LTC          | 0.800<br>(0.482, 1.118)                                | 0.162       | <0.001  | 0.326<br>(0.140, 0.512)                                | 0.095    | <0.001  |
| RA + MLTCs               | 0.856<br>(0.427, 1.285)                                | 0.219       | <0.001  | 0.617<br>(0.379, 0.854)                                | 0.121    | <0.001  |

Abbreviations: CCI = Charlson Comorbidity Index, EQ5D= EuroQol- 5 Dimension, HAQ-DI= Health Assessment Questionnaire-Disability Index, LTC= long-term conditions, MLTCs= multiple long-term conditions, RA= rheumatoid arthritis, SIMD: Scottish Index of Multiple Deprivation

**Table S5 Regression results for the EULAR grouping in the sensitivity analysis: coefficients of the GLM model estimating direct costs**

| Covariates               | Coefficient (95% CI)    | Std. Err | p Value |
|--------------------------|-------------------------|----------|---------|
| <b>Sex</b>               |                         |          |         |
| Male                     | Reference               |          |         |
| Female                   | -0.133 (-0.317, 0.052)  | 0.094    | <0.05   |
| <b>Age group</b>         |                         |          |         |
| < 45                     | Reference               |          |         |
| 45 – 54                  | 0.236 (-0.073, 0.546)   | 0.158    | 0.135   |
| 55 – 64                  | 0.270 (-0.030, 0.569)   | 0.153    | 0.007   |
| 65 – 75                  | 0.415 (0.107, 0.723)    | 0.157    | <0.01   |
| > 75                     | 0.855 (0.505, 1.206)    | 0.179    | <0.001  |
| <b>SIMD</b>              |                         |          |         |
| 1 (most deprived)        | Reference               |          |         |
| 2                        | -0.485 (-0.750, -0.220) | 0.135    | <0.001  |
| 3                        | -0.608 (-0.886, -0.301) | 0.142    | <0.001  |
| 4                        | -0.389 (-0.656, -0.123) | 0.136    | <0.01   |
| 5 (least deprived)       | -0.308 (-0.599, -0.016) | 0.149    | <0.05   |
| <b>Clinical outcomes</b> |                         |          |         |
| HAQ-DI score             | 0.201 (0.051, 0.350)    | 0.076    | <0.01   |
| EQ5D score               | -0.080 (-0.599, 0.439)  | 0.265    | 0.763   |
| <b>Follow-up period</b>  |                         |          |         |
| Index year               | Reference               |          |         |
| 2                        | 0.363 (0.074, 0.654)    | 0.148    | <0.05   |
| 3                        | 0.538 (0.246, 0.830)    | 0.149    | <0.001  |
| 4                        | 0.568 (0.274, 0.861)    | 0.150    | <0.001  |
| 5                        | 0.316 (0.019, 0.612)    | 0.151    | <0.05   |
| 6                        | 0.471 (0.171, 0.772)    | 0.153    | <0.01   |
| <b>LTC group</b>         |                         |          |         |
| RA alone                 | Reference               |          |         |
| RA + Single LTC          | 0.644 (0.402, 0.887)    | 0.141    | <0.001  |
| RA + MLTCs               | 1.530 (1.307, 1.754)    | 0.134    | <0.001  |

Abbreviations: EQ5D= EuroQol- 5 Dimension, EULAR: European Alliance of Associations for Rheumatology, GLM= generalised linear model, HAQ-DI= Health Assessment Questionnaire-Disability Index, LTC= long-term conditions, MLTCs= multiple long-term conditions, RA= rheumatoid arthritis, SIMD: Scottish Index of Multiple Deprivation

**Table S6 Regression results for the EULAR grouping in the sensitivity analysis: coefficients of the two-part model estimating indirect costs**

| Covariates                                      | 1st modelling part<br>(probability of incurring costs) |             |         | 2nd modelling part<br>(conditional on incurring costs) |             |         |
|-------------------------------------------------|--------------------------------------------------------|-------------|---------|--------------------------------------------------------|-------------|---------|
|                                                 | Coefficient<br>(95% CI)                                | Std.<br>Err | p value | Coefficient<br>(95% CI)                                | Std.<br>Err | p value |
| <b>Age group</b>                                |                                                        |             |         |                                                        |             |         |
| 18 – 34                                         | Reference                                              |             |         | Reference                                              |             |         |
| 35 – 44                                         | -0.142<br>(-0.441, 0.156)                              | 0.152       | 0.350   | 0.100<br>(-0.112, 0.312)                               | 0.108       | 0.356   |
| 45 – 54                                         | -0.264<br>(-0.551, 0.024)                              | 0.147       | 0.072   | 0.185<br>(-0.017, 0.386)                               | 0.103       | 0.073   |
| <b>Sex</b>                                      |                                                        |             |         |                                                        |             |         |
| Male                                            | Reference                                              |             |         | Reference                                              |             |         |
| Female                                          | 0.137<br>(-0.097, 0.372)                               | 0.120       | 0.251   | -0.427<br>(-0.595, -0.258)                             | 0.086       | <0.001  |
| <b>SIMD</b>                                     |                                                        |             |         |                                                        |             |         |
| 1 (most deprived)                               | Reference                                              |             |         | Reference                                              |             |         |
| 2                                               | 0.101<br>(-0.216, 0.420)                               | 0.162       | 0.531   | 0.003<br>(-0.200, 0.205)                               | 0.103       | 0.978   |
| 3                                               | -0.407<br>(-0.742, -0.071)                             | 0.171       | <0.05   | -0.016<br>(-0.258, 0.226)                              | 0.123       | 0.895   |
| 4                                               | -0.443<br>(-0.762, -0.123)                             | 0.163       | <0.01   | -0.170<br>(-0.390, -0.050)                             | 0.112       | 0.130   |
| 5 (least deprived)                              | -0.317<br>(-0.673, 0.039)                              | 0.182       | 0.081   | -0.121<br>(-0.373, 0.130)                              | 0.128       | 0.344   |
| <b>Clinical outcomes</b>                        |                                                        |             |         |                                                        |             |         |
| HAQ-DI score                                    | 0.409<br>(0.223, 0.596)                                | 0.095       | <0.001  | 0.179<br>(0.054, 0.305)                                | 0.064       | <0.01   |
| EQ5D score                                      | -1.230<br>(-1.865, -0.596)                             | 0.323       | <0.001  | -0.024<br>(-0.452, 0.403)                              | 0.218       | 0.910   |
| <b>LTC group (using EULAR comorbidity list)</b> |                                                        |             |         |                                                        |             |         |
| RA alone                                        | Reference                                              |             |         | Reference                                              |             |         |
| RA + Single LTC                                 | 0.752<br>(0.479, 1.025)                                | 0.139       | <0.001  | 0.167<br>(-0.041, 0.376)                               | 0.106       | 0.116   |
| RA + MLTCs                                      | 1.064<br>(0.801, 1.327)                                | 0.134       | <0.001  | 0.495<br>(0.302, 0.688)                                | 0.098       | <0.001  |

Abbreviations: EQ5D= EuroQol- 5 Dimension, EULAR: European Alliance of Associations for Rheumatology, HAQ-DI= Health Assessment Questionnaire-Disability Index, LTC= long-term conditions, MLTCs= multiple long-term conditions, RA= rheumatoid arthritis, SIMD: Scottish Index of Multiple Deprivation

**Table S7 Number of participants with EULAR list of comorbidities from multiple data sources**

| Data source               | CVD | GI  | Infection | Depression | Cancer | Osteoporosis |
|---------------------------|-----|-----|-----------|------------|--------|--------------|
| Prescription <sup>#</sup> | 304 | 269 | 13        | 126        | 12     | 91           |
| Hospitalisation           | 321 | 349 | 127       | 17         | 150    | 39           |
| Cancer registry           |     |     |           |            | 184    |              |
| <b>Overall*</b>           | 367 | 393 | 106       | 109        | 159    | 104          |

Abbreviations: CVD = cardiovascular diseases, GI = Gastrointestinal diseases

<sup>#</sup> Prescriptions were assigned by therapeutic uses for the six comorbidities within relevant British National Formulary chapters (Table S2). Subsequently, the Proportion of Days Covered (PDC) approach was adopted to identify medications with a PDC over 0.8 in the last year of follow-up (1/12/2018-30/11/2019).

\* Prescribing, hospital and cancer records were combined to count the number of long-term conditions.

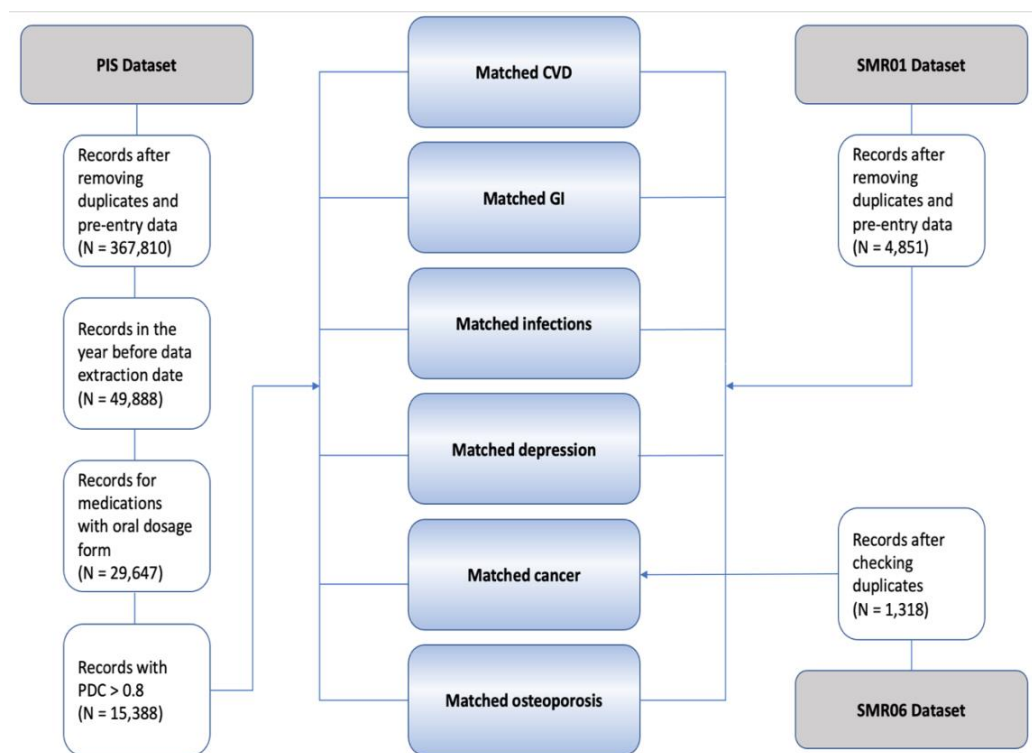

**Figure S1 Data preparation for identifying EULAR list of comorbidities**

Abbreviations: CVD = cardiovascular diseases, GI = Gastrointestinal diseases, PIS = Prescription Information System, SMR01 = Scottish Morbidity Records-general/acute inpatient daycase, SMR06 = Scottish Morbidity Records – cancer registry



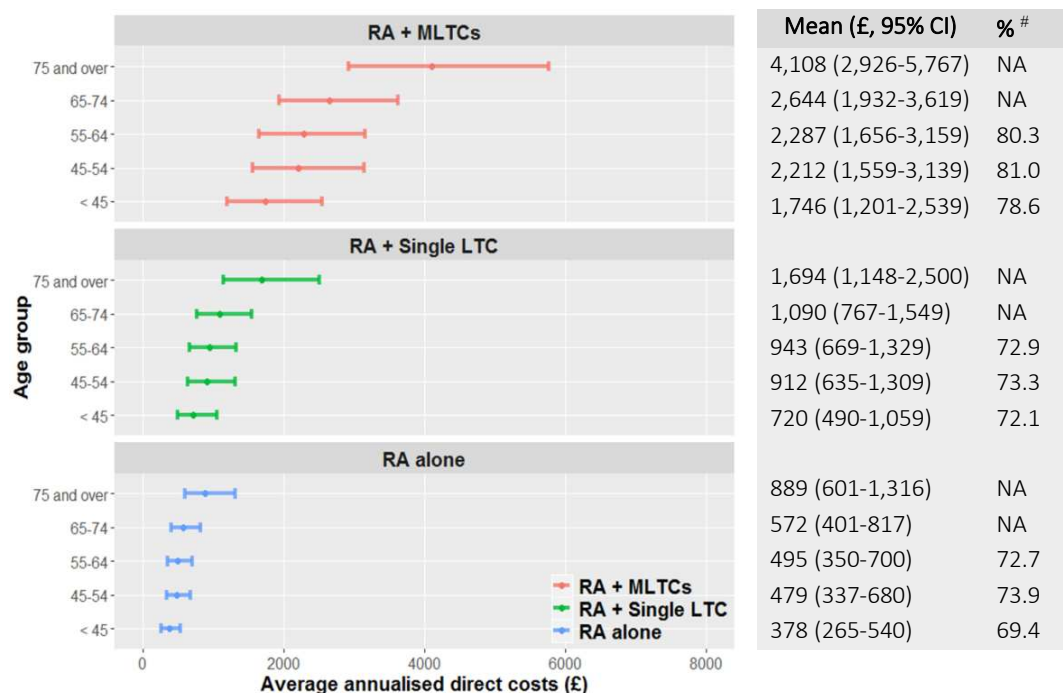

# The proportion of direct costs in total (direct and indirect) costs for those aged under 65 years within each age group.

**Figure S2A Average annualised direct costs by age and LTC group (EULAR grouping)**

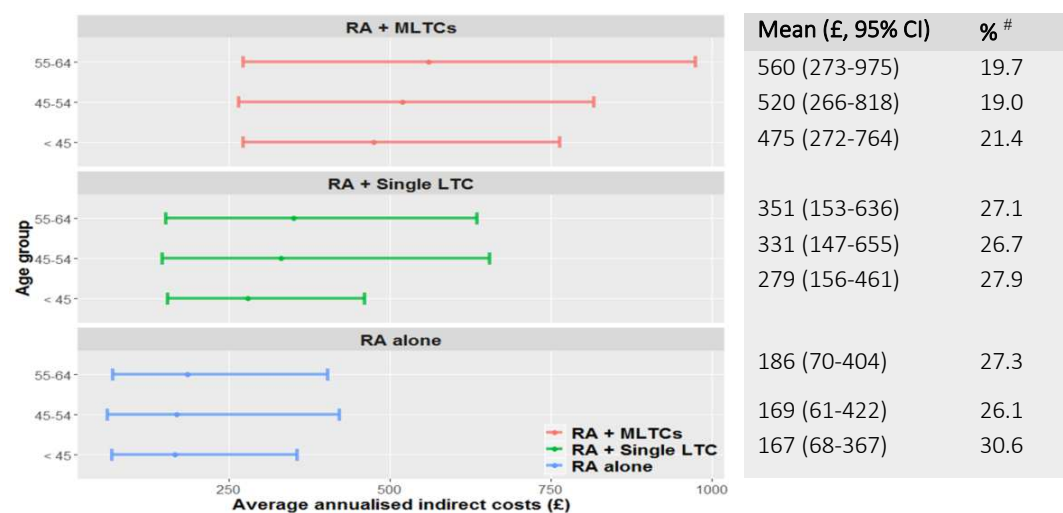

# The proportion of indirect costs in total (direct and indirect) costs for those aged under 65 years within each age group.

**Figure S2B Average annualised indirect costs by age and LTC group (EULAR grouping)**

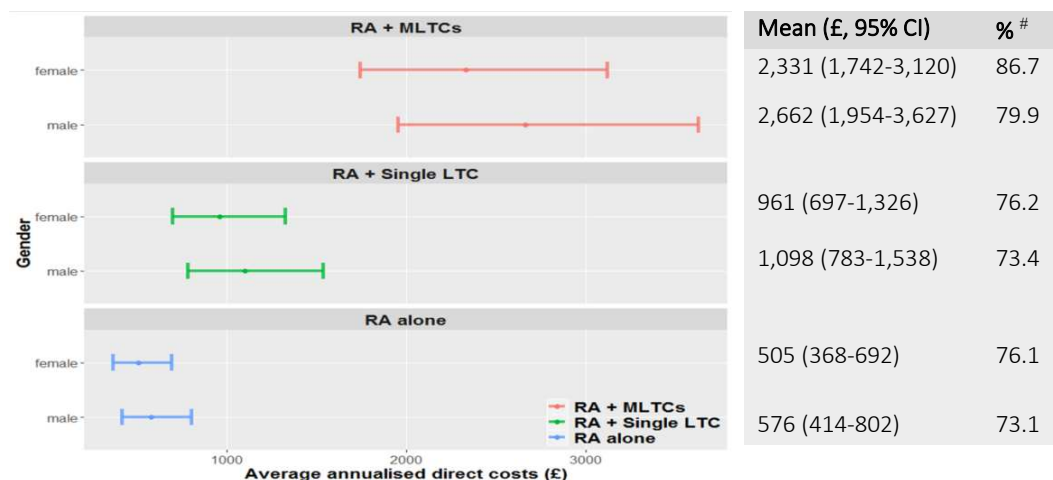

# The proportion of direct costs in total (direct and indirect) costs within each gender group.

**Figure S3A Average annualised direct costs by gender and LTC group (EULAR grouping)**

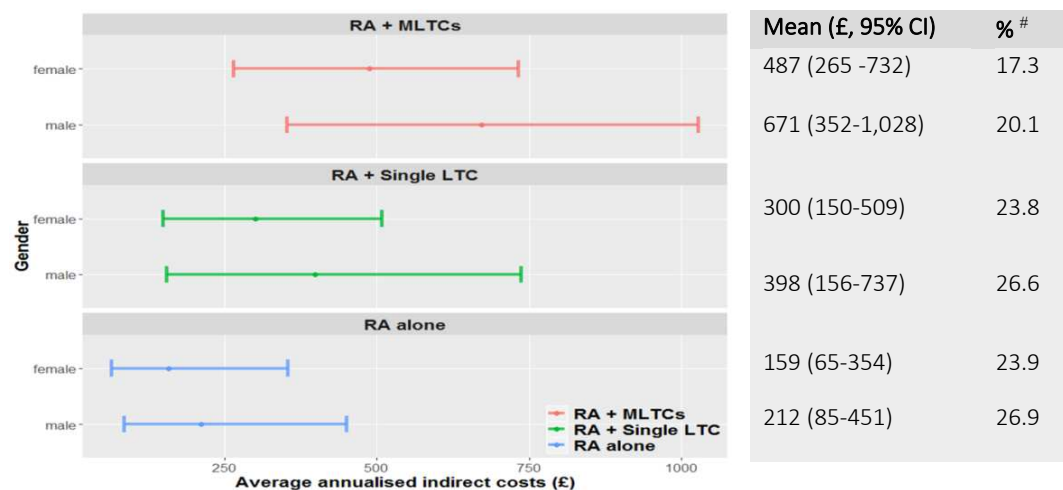

# The proportion of indirect costs in total (direct and indirect) costs within each gender group.

**Figure S3B Average annualised indirect costs by gender and LTC group (EULAR grouping)**
